# Supplementary material
Source: MDPI journal article supplement (https://www.mdpi.com/1999-4907/12/6/675)
Supplement: s1 [file s1]

## Supplemental material

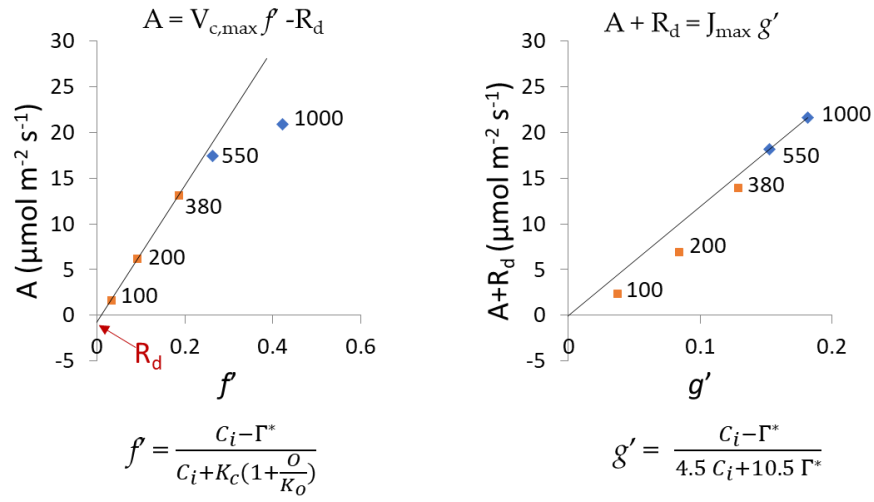

**Figure S1.** Light-saturated net photosynthetic rate ( $A$ ) as a function of  $f$  (left panel), and  $A + R_d$  as a function of  $g'$  (right panel) in a leaf of Japanese white birch. Slopes correspond to  $V_{c,\text{max}}$  and  $J_{\text{max}}$ , respectively.

### Measurements of electron transport rate

Electron transport rate (ETR) was calculated as  $ETR = PFD \times ABS \times \Phi_{PSII} \times 0.5$ , where PFD is photon flux density, ABS is leaf absorptance, and  $\Phi_{PSII}$  is quantum yield of photosystem (PS) II photochemistry [1].  $\Phi_{PSII}$  was measured using a portable photosynthesis system (LI-6400, Li-Cor, Lincoln, NE, USA) with a leaf chamber fluorometer (LI-6400-40, Li-Cor). Measurements were done under two levels of incident light intensities (PFD: 200 and 1500  $\mu\text{mol m}^{-2} \text{s}^{-1}$ ), under a block temperature of 27 °C, and respective growth  $\text{CO}_2$  concentrations (360 or 550  $\mu\text{mol mol}^{-1}$ ). We measured the steady state fluorescence ( $F_s$ ), and the maximal fluorescence for the light-adapted state ( $F'_m$ ) with a saturating flush (8000  $\mu\text{mol m}^{-2} \text{s}^{-1}$ , 1s). Based on  $F'_m$  and  $F_s$ , we calculated  $\Phi_{PSII}$  ( $\Phi_{PSII} = (F'_m - F_s)/F'_m$ ) [2]. ABS was estimated from SPAD reading, an index of leaf chlorophyll content, which was determined by a SPAD meter (SPAD-502, Minolta, Osaka, Japan), as  $ABS = 0.2302 \ln(\text{SPAD reading}) + 0.0158$  [3].

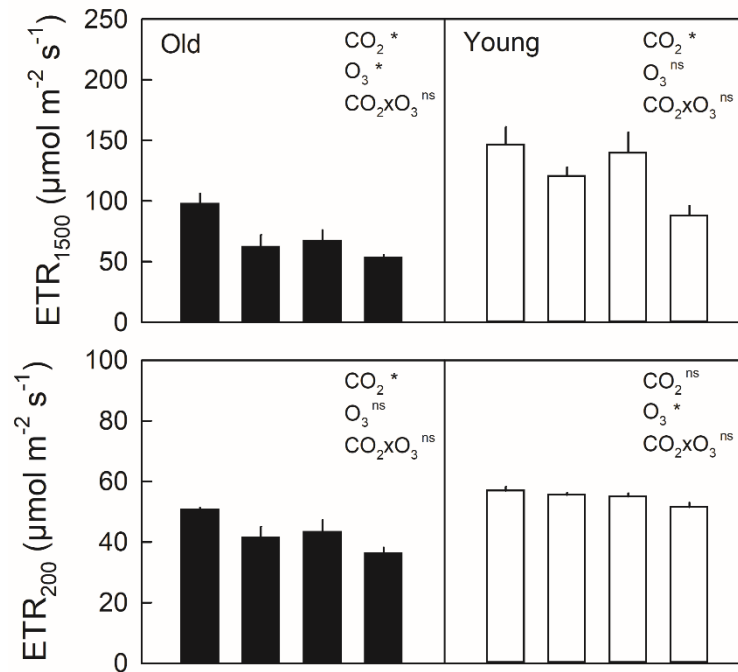

**Figure S2.** Electron transport rate under saturating (upper panel) or limiting light intensity (lower panel) in old (closed bars) and young leaves (open bars) of Japanese white birch seedlings grown under  $\text{CO}_2$  and  $\text{O}_3$  treatment combinations. Control: ambient air,  $\text{eCO}_2$ : elevated  $\text{CO}_2$ ,  $\text{eO}_3$ : elevated  $\text{O}_3$ , and  $\text{eCO}_2+\text{eO}_3$ : elevated  $\text{CO}_2$  and  $\text{O}_3$ . Young leaves were ca. 30 days old, and old leaves were ca. 60 days old. Measurements were conducted under the respective growth  $\text{CO}_2$  concentrations, where a  $\text{CO}_2$  concentration of 380  $\mu\text{mol mol}^{-1}$  was applied for control and  $\text{eO}_3$  plants, and 550  $\mu\text{mol mol}^{-1}$  was applied for  $\text{eCO}_2$  and  $\text{eCO}_2+\text{eO}_3$  plants. Significant effects of  $\text{CO}_2$  treatments,  $\text{O}_3$  treatments, and their interaction are indicated in the panel by \*  $P \leq 0.05$ . ns indicates non-significant. Values are mean + SE ( $n = 3$ ).

**Table S1.** *F* values of two-factorial ANOVA to test the effects of CO<sub>2</sub>, O<sub>3</sub>, and their interaction on ETR<sub>1500</sub>, and ETR<sub>200</sub>. Significant effects are indicated in the table by \*:  $P \leq 0.05$ .

|              | Effect                                               | ETR <sub>1500</sub> | ETR <sub>200</sub> |
|--------------|------------------------------------------------------|---------------------|--------------------|
| Old leaves   | CO <sub>2</sub> (F <sub>1,8</sub> )                  | 9.83*               | 7.86*              |
|              | O <sub>3</sub> (F <sub>1,8</sub> )                   | 6.23*               | 4.77               |
|              | CO <sub>2</sub> × O <sub>3</sub> (F <sub>1,8</sub> ) | 1.85                | 0.14               |
| Young leaves | CO <sub>2</sub> (F <sub>1,8</sub> )                  | 9.60*               | 3.94               |
|              | O <sub>3</sub> (F <sub>1,8</sub> )                   | 2.53                | 5.99*              |
|              | CO <sub>2</sub> × O <sub>3</sub> (F <sub>1,8</sub> ) | 1.05                | 0.77               |

## References

1. Long, S.P.; Bernacchi, C.J. Gas exchange measurements, what can they tell us about the underlying limitations to photosynthesis? Procedures and sources of error. *J. Exp. Bot.* **2003**, *54*, 2393–2401.
2. Genty, B.; Briantais, J.-M.M.; Baker, N.R. The relationship between the quantum yield of photosynthetic electron transport and quenching of chlorophyll fluorescence. *Biochim. Biophys. Acta - Gen. Subj.* **1989**, *990*, 87–92.
3. Kitao, M.; Lei, T.T.; Koike, T.; Kayama, M.; Tobita, H.; Maruyama, Y. Interaction of drought and elevated CO<sub>2</sub> concentration on photosynthetic down-regulation and susceptibility to photoinhibition in Japanese white birch seedlings grown with limited N availability. *Tree Physiol.* **2007**, *27*, 727–735.
